# Supplementary material
Source: Research Square preprint supplement (doi:10.21203/rs.3.rs-9372465/v1)
Supplement: Supplementary file 1 [file 135546f08218fc9b0d977a65.xlsx]

## Sheet: Sheet1
Country	Firm	Year	CapEx	ESG	GRC	ESG_c	GRC_c	ESGxGRC_c	RD_Spending	Cost_of_Capital	Dividend_Payout	Green_Bond_Issuance
USA	Firm1	2010	132.95	77.5	76.4	1.92578	-0.785333	-1.51238	60.23	6.38	29.3	197.38
USA	Firm1	2011	130.85	78.8	75.1	3.22578	-2.08533	-6.72682	40.37	6.27	30.73	92.6
USA	Firm1	2012	99.74	66.4	74.8	-9.17422	-2.38533	21.8836	48.14	6.05	25.76	193.97
USA	Firm1	2013	91.51	73.9	77.3	-1.67422	0.114667	-0.191977	39.56	6.56	26.55	161.27
USA	Firm1	2014	107.97	72	75.8	-3.57422	-1.38533	4.95149	63.52	6.49	26.83	174.68
USA	Firm1	2015	80.81	68.9	77.8	-6.67422	0.614667	-4.10242	31.72	6.6	32.22	155.14
USA	Firm1	2016	90.43	74.4	75.8	-1.17422	-1.38533	1.62669	37.8	6.27	33.17	160.31
USA	Firm1	2017	112.3	66.2	78.3	-9.37422	1.11467	-10.4491	38.23	6.81	33.09	177.94
USA	Firm1	2018	126.63	70.8	75.8	-4.77422	-1.38533	6.61389	54.76	6.26	29.44	116.81
USA	Firm1	2019	147.12	69	80.3	-6.57422	3.11467	-20.4765	44.28	7	31.08	130.65
USA	Firm1	2020	119.28	76.8	83.2	1.22578	6.01467	7.37264	60.65	5.19	32.47	152.61
USA	Firm1	2021	80.25	73.5	77.4	-2.07422	0.214667	-0.445266	42.8	6.68	34.43	134.45
USA	Firm1	2022	138.31	71	75	-4.57422	-2.18533	9.9962	48.29	6.24	31.54	152.91
USA	Firm1	2023	113.45	79.8	74.2	4.22578	-2.98533	-12.6154	41.08	5.77	30.89	157.83
USA	Firm1	2024	91.69	75	76.1	-0.574222	-1.08533	0.623223	40.79	6.33	27.59	145.16
UK	Firm2	2010	123.49	77	84.5	1.42578	7.31467	10.4291	47.58	6.46	24.24	149.2
UK	Firm2	2011	116.15	75.3	86.9	-0.274222	9.71467	-2.66398	48.02	6.48	26.49	184.28
UK	Firm2	2012	101.81	78.8	80.2	3.22578	3.01467	9.72464	59.03	5.8	31.76	215.71
UK	Firm2	2013	121.99	70	74.7	-5.57422	-2.48533	13.8538	39.97	5.72	30.21	118.13
UK	Firm2	2014	151	77.4	73.3	1.82578	-3.88533	-7.09376	37.17	6.34	32.44	113.07
UK	Firm2	2015	87.85	76.1	82.2	0.525778	5.01467	2.6366	46.85	6.63	32.35	112.89
UK	Firm2	2016	125.94	68.4	79.1	-7.17422	1.91467	-13.7362	47.5	6.67	27.96	156.97
UK	Firm2	2017	157.32	76.5	74.1	0.925778	-3.08533	-2.85633	49.74	5.9	31.97	120.76
UK	Firm2	2018	103.59	78.9	81.6	3.32578	4.41467	14.6822	54.63	6.71	32.47	206.9
UK	Firm2	2019	102.21	73.8	74	-1.77422	-3.18533	5.65149	36.84	6.46	31.02	158.3
UK	Firm2	2020	149.07	79.1	77.1	3.52578	-0.0853333	-0.300866	42.35	7.86	31.88	124.29
UK	Firm2	2021	115.53	69.6	78.9	-5.97422	1.71467	-10.2438	52.14	6.74	29.78	124.6
UK	Firm2	2022	137.13	67.4	75.2	-8.17422	-1.98533	16.2286	47.14	5.88	30.52	161.56
UK	Firm2	2023	121.16	70.6	77.6	-4.97422	0.414667	-2.06264	33.57	6.68	31.68	182.49
UK	Firm2	2024	101.24	80.3	71.5	4.72578	-5.68533	-26.8676	50.15	6.76	31.55	265.58
Germany	Firm3	2010	139.08	77.9	81.5	2.32578	4.31467	10.035	51.51	6.34	32.28	126.82
Germany	Firm3	2011	121.64	73.8	75.1	-1.77422	-2.08533	3.69984	68.15	5.57	32.06	101.62
Germany	Firm3	2012	121.29	72.6	81.4	-2.97422	4.21467	-12.5354	34.22	6.14	32.04	128.09
Germany	Firm3	2013	106.97	76.1	77.2	0.525778	0.0146667	0.00771141	66.44	6.82	23.92	155.59
Germany	Firm3	2014	104.15	71.7	80.4	-3.87422	3.21467	-12.4543	43.85	6.75	32.6	113.99
Germany	Firm3	2015	106.93	73.3	75.1	-2.27422	-2.08533	4.74251	62.65	6.7	26.22	177.54
Germany	Firm3	2016	89.61	85.6	81.1	10.0258	3.91467	39.2476	40.16	7.13	27.88	163.31
Germany	Firm3	2017	118.81	78.9	73.3	3.32578	-3.88533	-12.9218	12.59	5.99	29.24	112.57
Germany	Firm3	2018	111.2	83.2	71.3	7.62578	-5.88533	-44.8802	46.31	7.22	25.69	184.89
Germany	Firm3	2019	129.24	75.1	73.1	-0.474222	-4.08533	1.93736	46.99	6.2	30.21	138.44
Germany	Firm3	2020	151.72	75.6	79.6	0.0257778	2.41467	0.0622447	32.62	7.57	24.14	145.45
Germany	Firm3	2021	107.55	77.9	78.1	2.32578	0.914667	2.12731	42.92	6.25	28.23	175.49
Germany	Firm3	2022	137.99	76.8	74.2	1.22578	-2.98533	-3.65936	48.07	6.91	31.89	125.13
Germany	Firm3	2023	132.21	72.2	80	-3.37422	2.81467	-9.49731	44.79	6.56	33.83	132.25
Germany	Firm3	2024	115.65	77.7	76.2	2.12578	-0.985333	-2.0946	55.99	6.91	32.44	189.16
Japan	Firm4	2010	113.79	75.1	79.7	-0.474222	2.51467	-1.19251	48.24	6.43	30.29	167.85
Japan	Firm4	2011	99.88	70.9	85.4	-4.67422	8.21467	-38.3972	32.86	7.08	32.37	168.72
Japan	Firm4	2012	102.05	78.1	77	2.52578	-0.185333	-0.468111	45.76	6.16	32.93	145.59
Japan	Firm4	2013	128.26	70.9	75.7	-4.67422	-1.48533	6.94278	39.36	6.09	30.73	157.35
Japan	Firm4	2014	124.64	72.5	75.1	-3.07422	-2.08533	6.41078	30.52	5.8	27.84	143.6
Japan	Firm4	2015	137.15	76.6	82.9	1.02578	5.71467	5.86198	43.4	6.49	26.99	149.44
Japan	Firm4	2016	103.46	73.6	78.3	-1.97422	1.11467	-2.2006	50.19	7.27	29.67	162.05
Japan	Firm4	2017	124.48	78.5	75.4	2.92578	-1.78533	-5.22349	45.13	6.55	27.68	150.74
Japan	Firm4	2018	139.19	77.5	82.8	1.92578	5.61467	10.8126	66.53	6.12	32.62	155.5
Japan	Firm4	2019	103.21	85.9	73.8	10.3258	-3.38533	-34.9562	39.01	5.44	28.42	127.23
Japan	Firm4	2020	157.52	75.8	78.4	0.225778	1.21467	0.274245	54.5	6.21	27.3	164.76
Japan	Firm4	2021	143.59	68.4	84.3	-7.17422	7.11467	-51.0422	40.31	5.64	34.06	146.56
Japan	Firm4	2022	108.01	81.2	70.6	5.62578	-6.58533	-37.0476	45.05	6.52	28.65	168.69
Japan	Firm4	2023	122.41	69.7	76.4	-5.87422	-0.785333	4.61322	50.14	6.86	26.63	103.98
Japan	Firm4	2024	105.03	81.4	78.3	5.82578	1.11467	6.4938	60.51	6.56	33.54	152.03
France	Firm5	2010	115.02	85.3	84	9.72578	6.81467	66.2779	54.72	6.82	34.11	121.05
France	Firm5	2011	84.83	78.4	81.2	2.82578	4.01467	11.3446	33.17	5.48	29.19	171.53
France	Firm5	2012	152.57	82.5	77.3	6.92578	0.114667	0.794156	31.2	5.65	29.83	161.52
France	Firm5	2013	118.22	74.8	68.7	-0.774222	-8.48533	6.56953	31.96	6.83	31.1	121.8
France	Firm5	2014	118.75	72.4	72.8	-3.17422	-4.38533	13.92	54.55	6.01	31.51	134.09
France	Firm5	2015	99.3	71	76.6	-4.57422	-0.585333	2.67744	39.46	5.9	35.89	151.06
France	Firm5	2016	117.75	71.5	77.9	-4.07422	0.714667	-2.91171	42.79	6.81	32.27	134.08
France	Firm5	2017	73.96	72.1	75.9	-3.47422	-1.28533	4.46553	29.85	7.18	34.93	142.53
France	Firm5	2018	181.58	77.9	78.2	2.32578	1.01467	2.35989	56.2	6.44	27.13	101.81
France	Firm5	2019	91.55	76	74	0.425778	-3.18533	-1.35624	38.53	5.96	35.06	176.45
France	Firm5	2020	121.55	75	82.9	-0.574222	5.71467	-3.28149	36.39	7.26	31.62	118.88
France	Firm5	2021	92.34	74	73.5	-1.57422	-3.68533	5.80153	54.26	7.45	25.8	166.89
France	Firm5	2022	108.15	71.7	75.1	-3.87422	-2.08533	8.07904	36.36	6.52	27.51	158.11
France	Firm5	2023	101.85	74.7	76	-0.874222	-1.18533	1.03624	39.23	6.88	31.5	120.67
France	Firm5	2024	86.61	75.5	80	-0.0742222	2.81467	-0.208911	50.43	6.17	31.71	127.1
Canada	Firm6	2010	120.96	66	70.5	-9.57422	-6.68533	64.0069	47.6	6.05	31.92	100.15
Canada	Firm6	2011	106.96	74.7	72.2	-0.874222	-4.98533	4.35829	45.47	6.07	28.85	180.19
Canada	Firm6	2012	97.41	72.1	80.3	-3.47422	3.11467	-10.821	50.3	7.22	22.59	126.09
Canada	Firm6	2013	127.42	77.9	76.2	2.32578	-0.985333	-2.29167	38.96	6.54	29.53	185.03
Canada	Firm6	2014	111.76	76.3	78.4	0.725778	1.21467	0.881578	40.12	6.28	31.18	137.37
Canada	Firm6	2015	137.42	76.4	85.3	0.825778	8.11467	6.70091	41.74	7.1	28.78	88.86
Canada	Firm6	2016	112.97	70	69.5	-5.57422	-7.68533	42.8398	45.18	7.34	30.98	143.43
Canada	Firm6	2017	124.71	79.1	68.2	3.52578	-8.98533	-31.6803	52.71	5.76	33.43	160.15
Canada	Firm6	2018	165.41	72.9	79.5	-2.67422	2.31467	-6.18993	46.82	6.62	28.62	124.5
Canada	Firm6	2019	121.43	79.2	73.6	3.62578	-3.58533	-12.9996	40.22	6.74	31	181.13
Canada	Firm6	2020	100.42	72.4	75.9	-3.17422	-1.28533	4.07993	40.56	6.69	32.27	122.34
Canada	Firm6	2021	128.27	79.3	82.4	3.72578	5.21467	19.4287	63.77	6.11	26.27	96.64
Canada	Firm6	2022	118.89	82.5	79.6	6.92578	2.41467	16.7234	47.8	5.94	37.34	153.88
Canada	Firm6	2023	129.62	75.5	79.9	-0.0742222	2.71467	-0.201489	47.24	6.1	31.41	206.46
Canada	Firm6	2024	109.78	81.7	83.4	6.12578	6.21467	38.0697	35.1	6.44	30.17	182.83
Australia	Firm7	2010	116.84	66.5	83.1	-9.07422	5.91467	-53.671	40.73	5.99	25.04	174.7
Australia	Firm7	2011	94.1	75.4	71.8	-0.174222	-5.38533	0.938245	41.64	7.33	29.22	104.91
Australia	Firm7	2012	66.06	73.8	75.9	-1.77422	-1.28533	2.28047	44.46	6.38	32.09	205.47
Australia	Firm7	2013	97.87	80.6	75.9	5.02578	-1.28533	-6.4598	70.73	6.53	30.04	149.28
Australia	Firm7	2014	108.53	76	76.4	0.425778	-0.785333	-0.334377	39.53	6.48	28.37	128.61
Australia	Firm7	2015	150.08	75.5	76	-0.0742222	-1.18533	0.0879781	18.49	7.05	33.74	87.8
Australia	Firm7	2016	91.85	73.3	75.5	-2.27422	-1.68533	3.83282	37.22	5.94	35.26	178.07
Australia	Firm7	2017	97.42	81.4	79.9	5.82578	2.71467	15.815	39.75	6.74	26.33	171.39
Australia	Firm7	2018	134.22	73.8	75.5	-1.77422	-1.68533	2.99016	49.44	6.32	33.48	117.57
Australia	Firm7	2019	113.81	78.1	79.4	2.52578	2.21467	5.59376	48.26	5.87	32.77	144.45
Australia	Firm7	2020	105.91	72.4	81.2	-3.17422	4.01467	-12.7434	30.92	5.72	31.82	111.59
Australia	Firm7	2021	153.93	83.8	68.7	8.22578	-8.48533	-69.7985	47.11	6.45	28.37	161.97
Australia	Firm7	2022	122.28	74.8	81.4	-0.774222	4.21467	-3.26309	46.5	6.32	29.83	159.23
Australia	Firm7	2023	134.87	66.4	71.6	-9.17422	-5.58533	51.2411	46.71	6.41	30.06	160.43
Australia	Firm7	2024	123.92	72.3	73.9	-3.27422	-3.28533	10.7569	35.22	6.7	24.89	180.87
Netherlands	Firm8	2010	139.65	77.4	78	1.82578	0.814667	1.4874	61.65	7.01	24.48	111.61
Netherlands	Firm8	2011	130.35	71.9	77.1	-3.67422	-0.0853333	0.313534	37.74	6.59	27.73	131.65
Netherlands	Firm8	2012	92.97	68	73.3	-7.57422	-3.88533	29.4284	35.24	7.03	27.15	228.97
Netherlands	Firm8	2013	102.83	77.5	77.7	1.92578	0.514667	0.991134	52	6.21	30.37	226.8
Netherlands	Firm8	2014	105.94	74.5	81.6	-1.07422	4.41467	-4.74233	44.65	7.39	28.12	204.37
Netherlands	Firm8	2015	132.65	78.5	74.8	2.92578	-2.38533	-6.97896	54.73	6.81	25.29	128.19
Netherlands	Firm8	2016	132.41	73.8	76.7	-1.77422	-0.485333	0.861089	46.78	5.83	31.14	168.32
Netherlands	Firm8	2017	136.68	77.8	81.3	2.22578	4.11467	9.15833	49.59	6.46	25.02	162.89
Netherlands	Firm8	2018	94.47	76	78.1	0.425778	0.914667	0.389445	34.19	7.03	29.88	170.45
Netherlands	Firm8	2019	138.77	75.1	77.1	-0.474222	-0.0853333	0.040467	39.84	6.55	28.61	136.97
Netherlands	Firm8	2020	110.43	73.5	77.9	-2.07422	0.714667	-1.48238	57.56	6.05	29.44	136.81
Netherlands	Firm8	2021	140.64	82.2	77.8	6.62578	0.614667	4.07264	30.14	6.63	32.67	152.47
Netherlands	Firm8	2022	148.19	80.3	74.9	4.72578	-2.28533	-10.8	67.99	6.32	28.66	193.6
Netherlands	Firm8	2023	111.6	82.9	74.9	7.32578	-2.28533	-16.7418	42.18	5.83	27.24	119.88
Netherlands	Firm8	2024	124.68	71.2	76.9	-4.37422	-0.285333	1.24811	60.51	6	32.95	143.58
Sweden	Firm9	2010	97.55	74.8	79.7	-0.774222	2.51467	-1.94691	48.82	6.58	31.48	158.68
Sweden	Firm9	2011	109.38	87.3	74.4	11.7258	-2.78533	-32.6602	38.77	6.22	28.09	185.67
Sweden	Firm9	2012	103.35	82.1	74.7	6.52578	-2.48533	-16.2187	49.71	6.22	31.9	156.09
Sweden	Firm9	2013	155.92	67.4	83.2	-8.17422	6.01467	-49.1652	38.87	6.31	30.86	160.03
Sweden	Firm9	2014	116.46	78.3	85	2.72578	7.81467	21.301	37.02	5.81	27.81	149.01
Sweden	Firm9	2015	124.48	84	74.9	8.42578	-2.28533	-19.2557	44.84	7.09	37.58	134.07
Sweden	Firm9	2016	133.64	72.6	81.2	-2.97422	4.01467	-11.9405	63.47	6.79	28.92	167.72
Sweden	Firm9	2017	130.15	80.5	80.3	4.92578	3.11467	15.3422	55.67	7.08	34.15	169.46
Sweden	Firm9	2018	144.13	74.2	77.6	-1.37422	0.414667	-0.569844	36.83	6.68	28.82	150.86
Sweden	Firm9	2019	120.93	81.4	77.8	5.82578	0.614667	3.58091	31.4	6.87	31.94	214.9
Sweden	Firm9	2020	124.99	73.5	77.9	-2.07422	0.714667	-1.48238	60.77	6.45	30.84	168.24
Sweden	Firm9	2021	123.88	75.9	75.2	0.325778	-1.98533	-0.646777	55.74	5.99	30.4	129
Sweden	Firm9	2022	108.82	81	70.9	5.42578	-6.28533	-34.1028	48.77	7.28	29.8	133.34
Sweden	Firm9	2023	76.02	84.4	71.2	8.82578	-5.98533	-52.8252	49.4	6.25	26.94	171.25
Sweden	Firm9	2024	94.39	76.2	74.7	0.625778	-2.48533	-1.55527	53.72	6.83	29.7	205.4
South Korea	Firm10	2010	106.16	69.6	70.9	-5.97422	-6.28533	37.55	44.54	6.62	29.28	160.56
South Korea	Firm10	2011	118.36	68.7	82.8	-6.87422	5.61467	-38.5965	56.17	6.67	31.37	167.09
South Korea	Firm10	2012	146.58	77.2	79.6	1.62578	2.41467	3.92571	46.97	6.85	29.73	193.2
South Korea	Firm10	2013	119.2	71.6	84.2	-3.97422	7.01467	-27.8778	30.69	6.56	27.96	175.22
South Korea	Firm10	2014	82.21	71.7	75.2	-3.87422	-1.98533	7.69162	40.48	5.29	25.25	172.81
South Korea	Firm10	2015	100.66	78.9	78.7	3.32578	1.51467	5.03744	44.52	6.5	26.52	195.1
South Korea	Firm10	2016	120.54	79.4	76.1	3.82578	-1.08533	-4.15224	47.08	5.48	29.26	129.54
South Korea	Firm10	2017	155.95	70	75.9	-5.57422	-1.28533	7.16473	51.41	6.21	31.72	191.98
South Korea	Firm10	2018	107.06	79.6	77.2	4.02578	0.0146667	0.0590447	51.98	6.7	32.69	169.06
South Korea	Firm10	2019	146.35	80.2	74.9	4.62578	-2.28533	-10.5714	46.98	7.54	27.93	202.08
South Korea	Firm10	2020	110.32	76	74.4	0.425778	-2.78533	-1.18593	41.8	6.71	31.57	132.79
South Korea	Firm10	2021	154.55	74.9	85.6	-0.674222	8.41467	-5.67336	49.36	6.52	30.36	168.41
South Korea	Firm10	2022	86.63	69.9	76	-5.67422	-1.18533	6.72584	48.99	6.82	28.55	197.22
South Korea	Firm10	2023	124.49	68.9	71.1	-6.67422	-6.08533	40.6149	55.47	7.34	28.62	182.36
South Korea	Firm10	2024	137.67	74.8	76.3	-0.774222	-0.885333	0.685445	51.52	5.71	34.43	191.4
India	Firm11	2010	129.88	71.9	78.6	-3.67422	1.41467	-5.1978	47.61	6.22	27.99	149.23
India	Firm11	2011	112.59	80.9	79.2	5.32578	2.01467	10.7297	52.72	5.08	33.45	97.81
India	Firm11	2012	94.11	73.2	72.5	-2.37422	-4.68533	11.124	56.61	6.27	31.04	148.59
India	Firm11	2013	94.34	77.4	77.3	1.82578	0.114667	0.209356	54.96	6.25	25.33	137.16
India	Firm11	2014	113.03	82.5	80.4	6.92578	3.21467	22.2641	41.51	6.34	36.23	161.46
India	Firm11	2015	124.78	77.2	81.1	1.62578	3.91467	6.36438	42.41	6.4	29.79	148.88
India	Firm11	2016	134.65	78.6	77.2	3.02578	0.0146667	0.0443781	44.19	6.54	24.01	177.49
India	Firm11	2017	62.07	76.7	81	1.12578	3.81467	4.29447	65.88	6.43	33.32	118.8
India	Firm11	2018	107.52	78.1	72.8	2.52578	-4.38533	-11.0764	64.14	6.4	30.65	176.1
India	Firm11	2019	127.3	77.5	77.6	1.92578	0.414667	0.798556	69.03	6.47	30.6	181.52
India	Firm11	2020	132.77	80.5	81.7	4.92578	4.51467	22.2382	33.57	7.32	26.56	159.08
India	Firm11	2021	126.58	71.2	76.7	-4.37422	-0.485333	2.12296	48.21	6.71	34.84	163.61
India	Firm11	2022	143.79	73.8	80.9	-1.77422	3.71467	-6.59064	32.72	6.8	32.1	141.07
India	Firm11	2023	122.51	81.9	76.4	6.32578	-0.785333	-4.96784	43.27	6.51	26.71	106.8
India	Firm11	2024	100.17	83	73.6	7.42578	-3.58533	-26.6239	23.47	6.18	26.03	199.26
Brazil	Firm12	2010	165.05	80	74.2	4.42578	-2.98533	-13.2124	54.82	6.34	22.5	218.73
Brazil	Firm12	2011	140.45	68.1	70.4	-7.47422	-6.78533	50.7151	69.4	7.19	31.69	167.84
Brazil	Firm12	2012	125.62	79.3	80	3.72578	2.81467	10.4868	46.04	6.47	27.74	141.58
Brazil	Firm12	2013	100.23	66.5	76.6	-9.07422	-0.585333	5.31144	33.96	6.59	34.18	177.55
Brazil	Firm12	2014	138.82	67.1	73	-8.47422	-4.18533	35.4674	35.18	6.39	31.65	120.95
Brazil	Firm12	2015	107.97	75.5	71.7	-0.0742222	-5.48533	0.407134	48.2	5.7	31.32	149.41
Brazil	Firm12	2016	147.28	77.8	77.9	2.22578	0.714667	1.59069	46.25	6.29	30.37	166.3
Brazil	Firm12	2017	105.96	75.2	77.2	-0.374222	0.0146667	-0.00548859	38.37	5.8	35.25	112.68
Brazil	Firm12	2018	137.9	71.5	74.1	-4.07422	-3.08533	12.5703	42.05	7.12	27.98	158.37
Brazil	Firm12	2019	96.25	70.8	85.6	-4.77422	8.41467	-40.1735	48.1	6.82	31.24	144.44
Brazil	Firm12	2020	117.06	74.4	77.2	-1.17422	0.0146667	-0.0172219	54.64	7.61	28.33	108.91
Brazil	Firm12	2021	103.93	74.6	87.3	-0.974222	10.1147	-9.85393	61.39	7.34	28.34	167.07
Brazil	Firm12	2022	115.93	83.1	75.5	7.52578	-1.68533	-12.6834	39.18	5.99	28.05	113.28
Brazil	Firm12	2023	124.68	75.2	73.9	-0.374222	-3.28533	1.22944	29.44	6.67	32.5	90.19
Brazil	Firm12	2024	95.81	76.9	81.9	1.32578	4.71467	6.2506	61.73	6.71	27.88	148.33
South Africa	Firm13	2010	130.78	77.8	77.3	2.22578	0.114667	0.255223	35.79	6.58	25.76	146.66
South Africa	Firm13	2011	144.72	70.5	74.1	-5.07422	-3.08533	15.6557	55.91	6.8	26.72	140.51
South Africa	Firm13	2012	166.39	81.1	77.6	5.52578	0.414667	2.29136	48.93	6.6	29.07	154.01
South Africa	Firm13	2013	139.13	74.2	79.8	-1.37422	2.61467	-3.59313	37.14	5.83	24.49	165.24
South Africa	Firm13	2014	127.77	69.5	68.4	-6.07422	-8.78533	53.3641	69.93	6.5	32.52	152.45
South Africa	Firm13	2015	114.19	74.5	80.7	-1.07422	3.51467	-3.77553	47.67	6.66	28	179.76
South Africa	Firm13	2016	130.73	74.1	74	-1.47422	-3.18533	4.69589	36.02	6.51	29.97	182.58
South Africa	Firm13	2017	136.36	77.4	76.9	1.82578	-0.285333	-0.520955	58.9	6.78	30.03	110.64
South Africa	Firm13	2018	107.81	69.7	75.8	-5.87422	-1.38533	8.13776	43.13	6.53	31.59	147.89
South Africa	Firm13	2019	80.49	77.4	77.3	1.82578	0.114667	0.209356	35.61	6.43	26.37	168
South Africa	Firm13	2020	115.73	82.7	81.9	7.12578	4.71467	33.5957	59.91	6.57	28.99	131.6
South Africa	Firm13	2021	123.41	73.5	75.4	-2.07422	-1.78533	3.70318	46.61	6.5	31.31	185.72
South Africa	Firm13	2022	68.92	79.7	71.1	4.12578	-6.08533	-25.1067	54.34	5.82	29.33	114.9
South Africa	Firm13	2023	135.18	66	79.2	-9.57422	2.01467	-19.2889	39.23	5.2	28.36	161.75
South Africa	Firm13	2024	119.69	67.6	77.7	-7.97422	0.514667	-4.10407	50.79	6.56	27.08	185.9
China	Firm14	2010	101.33	74.2	76.9	-1.37422	-0.285333	0.392111	40.57	6.06	29.48	201.35
China	Firm14	2011	149.42	68.1	70.5	-7.47422	-6.68533	49.9677	42.91	6.17	33.12	131.83
China	Firm14	2012	110.24	84.1	79.7	8.52578	2.51467	21.4395	66.57	6.2	32.23	158.98
China	Firm14	2013	120.64	81.5	83.2	5.92578	6.01467	35.6416	37.47	6.73	27.97	210.4
China	Firm14	2014	123.69	75.7	75.5	0.125778	-1.68533	-0.211977	31.53	6.01	33.6	130.29
China	Firm14	2015	143.71	69.8	79.1	-5.77422	1.91467	-11.0557	52.19	7	27.73	107.35
China	Firm14	2016	114.98	82.5	75.7	6.92578	-1.48533	-10.2871	58.28	6.78	31.37	214.95
China	Firm14	2017	121.14	71.8	80.7	-3.77422	3.51467	-13.2651	47.69	7.26	31.52	166.15
China	Firm14	2018	103.22	80.4	75.5	4.82578	-1.68533	-8.13304	34.55	5.52	36.17	116.9
China	Firm14	2019	126.15	73.9	75.9	-1.67422	-1.28533	2.15193	53.16	6.93	28.25	144.99
China	Firm14	2020	152.15	76.4	76	0.825778	-1.18533	-0.978822	49.91	6.87	31.99	185.2
China	Firm14	2021	127.99	75.9	71.8	0.325778	-5.38533	-1.75442	38.49	6.24	31.76	187.15
China	Firm14	2022	154.04	75.1	78.2	-0.474222	1.01467	-0.481177	47.41	7.8	31.7	97.18
China	Firm14	2023	145.8	78.8	78.5	3.22578	1.31467	4.24082	51.73	6.43	26.33	143.73
China	Firm14	2024	131.77	70.7	74.7	-4.87422	-2.48533	12.1141	61.7	6.7	26.41	163.34
Mexico	Firm15	2010	117.32	81	74.6	5.42578	-2.58533	-14.0274	45.15	6.11	31.94	146.37
Mexico	Firm15	2011	111.25	77.1	73.5	1.52578	-3.68533	-5.623	52.22	6.31	35.18	138.01
Mexico	Firm15	2012	91.63	76.1	80.7	0.525778	3.51467	1.84793	27.39	5.74	33.79	133.44
Mexico	Firm15	2013	123.69	87.8	74.7	12.2258	-2.48533	-30.3851	60.42	7.5	36.18	186.25
Mexico	Firm15	2014	135.57	80.1	79.4	4.52578	2.21467	10.0231	39.49	6.09	29.99	144.89
Mexico	Firm15	2015	139.11	72.7	79.8	-2.87422	2.61467	-7.51513	45.88	7.24	26.57	144.19
Mexico	Firm15	2016	118.35	71.4	69.5	-4.17422	-7.68533	32.0803	43.78	7.26	31.89	119.27
Mexico	Firm15	2017	131.64	84.3	81.9	8.72578	4.71467	41.1391	42.74	6.02	28.88	182.66
Mexico	Firm15	2018	110.22	84.4	83.2	8.82578	6.01467	53.0841	33.8	6.57	24.69	159.7
Mexico	Firm15	2019	88.11	74.3	75.1	-1.27422	-2.08533	2.65718	50.14	6.23	26.49	63.83
Mexico	Firm15	2020	153.23	74.9	84.1	-0.674222	6.91467	-4.66202	40.43	6.2	31.41	120.05
Mexico	Firm15	2021	144.54	76.5	80.1	0.925778	2.91467	2.69833	44	6.4	27.37	125.19
Mexico	Firm15	2022	138.27	73.9	78.5	-1.67422	1.31467	-2.20104	36.97	7.25	29.19	149.36
Mexico	Firm15	2023	137.68	71.3	67.3	-4.27422	-9.88533	42.2521	52.37	6.36	30.2	165.48
Mexico	Firm15	2024	135.89	67.2	74.9	-8.37422	-2.28533	19.1379	32.46	6.65	25.93	163.99
